# Supplementary material
Source: HighWire-hosted journal article supplement (https://bmjopen.bmj.com/content/14/12/e086908)
Supplement: inline-supplementary-material-1 [file inline-supplementary-material-1.pdf]

## Appendix 1. Predicting adult chronic health issues in early pregnancy Workshop Questions

- What do you think are the top priorities for health research into chronic health issues? These are health problems that you can not catch from someone and are often ongoing (lasting for a long time).
  - think about conditions that are in the media and people you know

We have talked about how a person's genetics and early life experiences can effect long term health outcomes. We are trying to develop tests to identify high genetic risks for some health problems *very early on*, so we can target health resources and support to those who need it most. We are trying to work out, for example, if a newborn baby might be at risk for high blood pressure or obesity in later life and try to get the mum and family extra support with healthy nutrition early on.

- Do you think this type of test should be an option?
- why or why not?
- List as many pros and cons of this type of early screening as you can think of

If you were asked to be part of a research project how would you like to be approached?

- Would there be something that would make you say yes or no? what are some examples of these?
- Would you be happy to give blood (why/why not)?
- What about asking your partner or the baby's biological father (why/why not)?
- What about researchers using your baby's cord blood or placenta? (why/why not?)
- What about other samples (urine, stool, swabs)? Are there some samples you would prefer to not give and what would they be (examples, why/why not)?

Think about the presentation at the start of today's workshop.

- Were there specific things that helped you understand genetics and precision medicine?
- How would you like information presented on these topics? *Examples given verbally*
  - Pictures

- Videos
- Written content
- Hardcopy or online content
